# Supplementary material for: Organoboron emitters with narrowband thermally activated delayed fluorescence for doped organic light emitting diodes
Source: Royal Society of Chemistry journal article supplement (doi:10.1039/d4nj05279j), 2025-01-01
Supplement: d4nj05279j1.pdf [file d4nj05279j1.pdf]

*Supporting Information*

*for*

**Organoboron Emitters with Narrowband Thermally Activated Delayed Fluorescence for Doped Organic Light Emitting Diodes**

*Tingting Zhao,<sup>a</sup> Suru A,<sup>b</sup> Yurong Ma,<sup>b</sup> Nan Wang,<sup>b</sup> Zhongmin Su,<sup>\*b</sup> and Fangbin Liu<sup>\*b</sup>*

<sup>a</sup> School of Materials Science and Engineering, Changchun University of Science and Technology, Changchun, Jilin 130022, China

<sup>b</sup> School of Chemistry and Environmental Engineering, Jilin Provincial Science and Technology Innovation Center of Optical Materials and Chemistry, Jilin Provincial International Joint Research Center of Photo-functional Materials and Chemistry, Changchun University of Science and Technology, Changchun, Jilin 130022, China.

\* Corresponding Author

E-mail address: zmsu@nenu.edu.cn (Z.M. Su); liufangbin@cust.edu.cn (F.B. Liu).

## 1. Materials and Characterization

**Materials and reagents:** All reactions were performed under an N<sub>2</sub> atmosphere unless otherwise specified. All reagents and solvents were used as received from commercial resources without further purification, unless otherwise specified. Dichloromethane (DCM) and tetrahydrofuran (THF) used in the reactions were freshly distilled using appropriate drying reagents. Material 1 was prepared according to the methods described in a previous article. The materials investigated in this paper were synthesized according to the procedures described below.

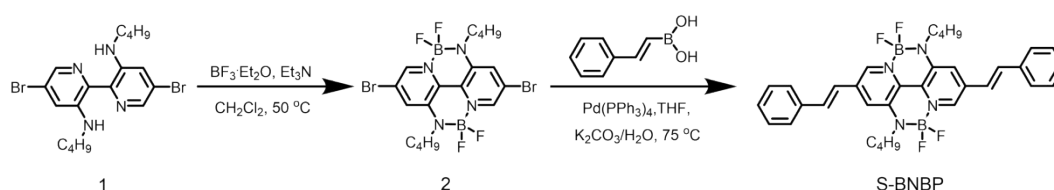

Scheme 1. Synthetic route of S-BNBP.

**Synthesis of Dibromo-substituted BNBP (Compound 2):** Under nitrogen atmosphere, a solution of BF<sub>3</sub>·Et<sub>2</sub>O (1.3 mL, 20 eq) and Et<sub>3</sub>N (0.7 mL, 10 eq) were alternately added to the solution of compound 1 (200 mg, 1 eq) in dry CH<sub>2</sub>Cl<sub>2</sub> (15 mL). The reaction mixture was stirred at 50 °C for 2 h with the color changing from yellow to orange. After the reaction, the mixture was extracted and dried. The resulting orange solid was purified by column chromatography on silica gel (DCM/PE = 2/1) as the eluent. The intermediate compound 2 was obtained as an orange-red solid in 91% yield (143 mg, 0.26 mmol).

**Synthesis of S-BNBP:** The materials of 2 (100 mg, 1 eq), styrylboronic acid (67.3 mg, 2.5 eq) and Pd(PPh<sub>3</sub>)<sub>4</sub> (30 mg, 0.15 eq) were added to a 100 ml two-necked flask under nitrogen, then anhydrous and oxygen-free THF was added and stirred at 75 °C. K<sub>2</sub>CO<sub>3</sub> aqueous solution (0.5 mol/L, 1.1 ml, 3 eq) was added and stirred at 75 °C for 24 h. After extraction with water and DCM, the mixture was dried with anhydrous MgSO<sub>4</sub> and purified by column chromatography on silica gel (CH<sub>2</sub>Cl<sub>2</sub>/PE = 2/1). S-BNBP was obtained as a red solid in 78% yield (81 mg, 0.14 mmol). Elemental analysis: C, 68.26; H, 6.07; B, 3.61; F, 12.70; N, 9.36.

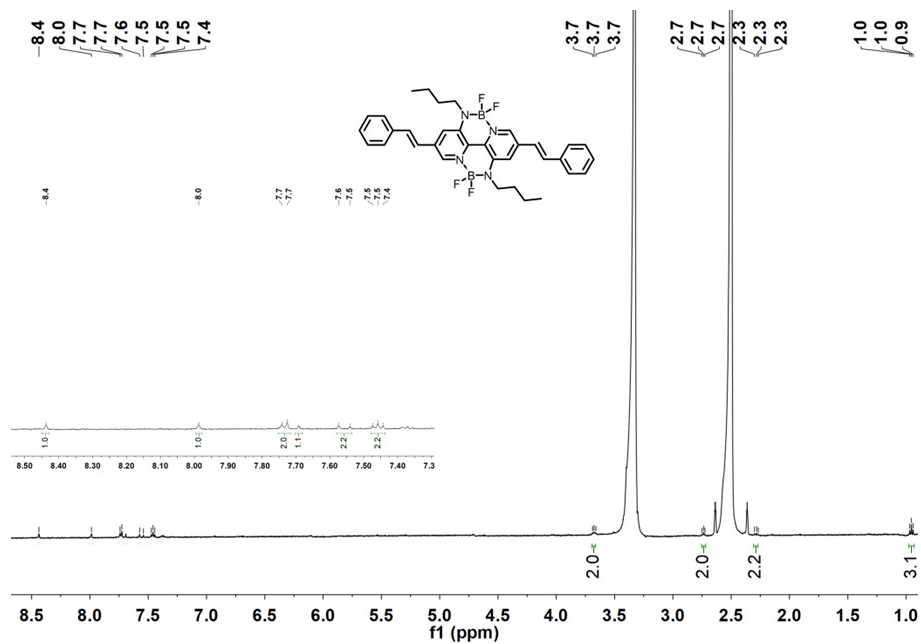

Fig. S1 <sup>1</sup>H NMR spectrum of S-BNBP.

**Characterization.** UV-vis absorption spectra were measured using Shimadzu UV-3600 and UV-9000s spectrometer. Fluorescence spectra were measured using a Hitachi F-7000 spectrometer. Fluorescence quantum yields and fluorescence lifetimes were determined with an Edinburgh FLS1000 steady state fluorimeter equipped with an integrating sphere. CV was performed with a CHI660C electrochemistry station using  $\text{Bu}_4\text{NPF}_6$  (0.1 M) as electrolyte, and using Pt as working electrode, platinum wire as auxiliary electrode, and a porous glass wick Ag/AgCl as reference electrode. Single crystal data was obtained by using a Rigaku XtaLAB Synergy. TEM images and the SAED patterns were obtained by JEOL JEM-2100. Powder X-ray diffraction (PXRD) were measured by a D/max 2400 X-ray diffractometer with Cu  $K\alpha$  radiation ( $\lambda = 1.54050 \text{ \AA}$ ) operated in the  $2\theta$  range from  $5^\circ$  to  $50^\circ$ . Using a homemade micro-PL system for micro-area PL spectral analysis of S-BNBP, i.e. laser confocal scanning microscope (Leica, TCS-SP5) equipped with a UV4 laser (420nm).

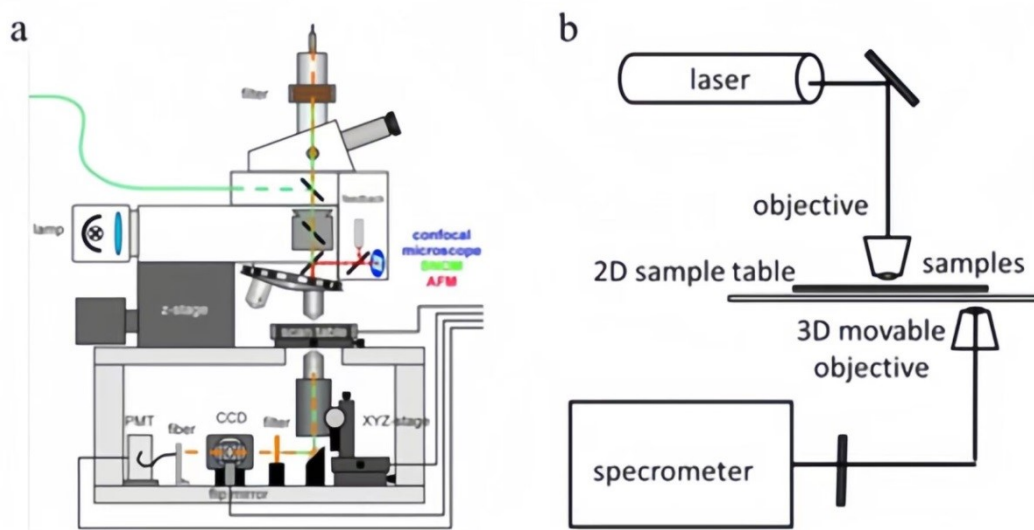

Fig. S2 Schematic illustration of (a) the near-field scanning optical microscopy and (b) the transmittance optical path for the waveguide measurements.

## 2. X-ray crystal data

Single crystal of  $C_{34}H_{36}B_2F_4N_4$  was collected. A suitable crystal was selected and  $GaK\alpha$  on a diffractometer. The crystal was kept at 170.00 K during data collection. Using Olex2, the structure was solved with the SHELXT structure solution program using Intrinsic Phasing and refined with the SHELXL refinement package using Least Squares minimisation. CCDC number of 2365183 (S-BNBP) contain the supplementary crystallographic data for this paper. The data can be obtained free of charge from The Cambridge Crystallographic Data Centre via [www.ccdc.cam.ac.uk/structures/](http://www.ccdc.cam.ac.uk/structures/).

X-ray crystallographic analysis of S-BNBP. The single crystals all suitable for XRD analysis were grown by recrystallization in toluene at high temperature. Crystal Data for S-BNBP are shown in Table S1.

**Table S1.** Crystal data for S-BNBP crystal.

| Parameters                        | S-BNBP (CCDC no. 2365183)                                                    |
|-----------------------------------|------------------------------------------------------------------------------|
| Empirical formula                 | C <sub>34</sub> H <sub>36</sub> B <sub>2</sub> F <sub>4</sub> N <sub>4</sub> |
| Formula weight                    | 598.29                                                                       |
| Temperature/K                     | 170.00                                                                       |
| Crystal system                    | Triclinic                                                                    |
| Space group                       | P-1                                                                          |
| Cell Lengths (Å)                  | a = 6.2488 (9) Å                                                             |
|                                   | b = 8.9759(12) Å                                                             |
|                                   | c = 14.662(2) Å                                                              |
| Cell Angles (°)                   | a = 72.625(5)°                                                               |
|                                   | b = 79.192(5)°                                                               |
|                                   | c = 71.413(4)°                                                               |
| Volume                            | 740.04(18) Å <sup>3</sup>                                                    |
| Z                                 | 1                                                                            |
| Density (calculated)              | 1.342 g/cm <sup>3</sup>                                                      |
| Absorption coefficient            | 0.504 mm <sup>-1</sup>                                                       |
| F(000)                            | 314.0                                                                        |
| Crystal size/mm <sup>3</sup>      | 0.19 × 0.04 × 0.02                                                           |
| 2θ range for data collection/°    | 5.524 to 121.598                                                             |
| Index ranges                      | -8 ≤ h ≤ 8                                                                   |
|                                   | -11 ≤ k ≤ 9                                                                  |
|                                   | -18 ≤ l ≤ 18                                                                 |
| Reflections collected             | 10649                                                                        |
| Independent reflections           | 3356 [R <sub>int</sub> = 0.0563, R <sub>sigma</sub> = 0.0699]                |
| Data/restraints/<br>parameters    | 356/0/200                                                                    |
| Goodness-of-fit on F <sup>2</sup> | 1.092                                                                        |
| Final R indexes<br>[I ≥ 2σ (I)]   | R <sub>1</sub> = 0.0695, wR <sub>2</sub> = 0.1878                            |
| Final R indexes<br>[all data]     | R <sub>1</sub> = 0.0865, wR <sub>2</sub> = 0.2013                            |
| Largest diff. peak and hole       | 0.60/-0.34 Å <sup>-3</sup>                                                   |

### 3. Absorption and PL spectra

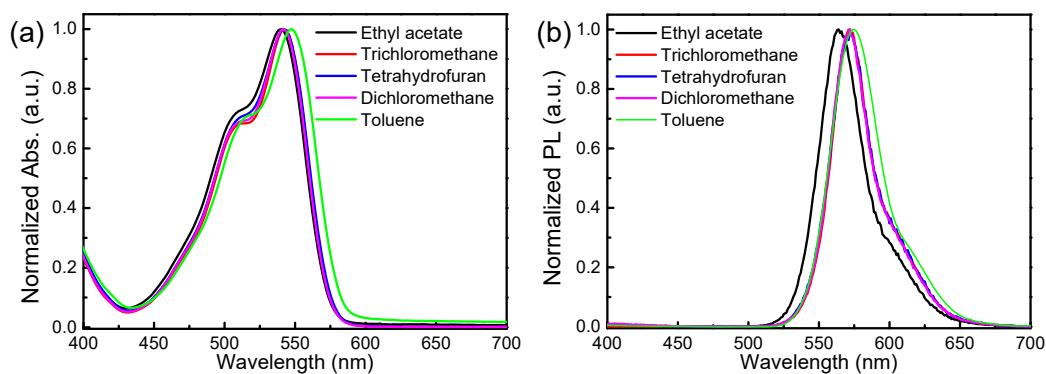

Fig. S3 (a) The absorption and (b) PL spectra of S-BNBP in the different solvents.

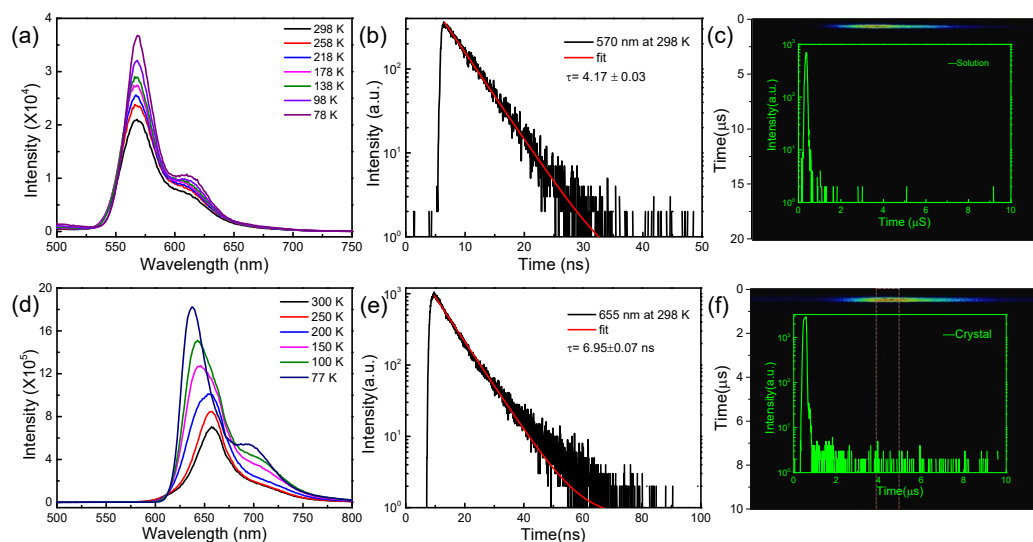

Fig. S4 (a, d) PL spectra at different temperatures, (b, e) fluorescence lifetimes and (c, f) Streak camera images for S-BNBP (a, b, c) in solution and (d, e, f) microsheets.

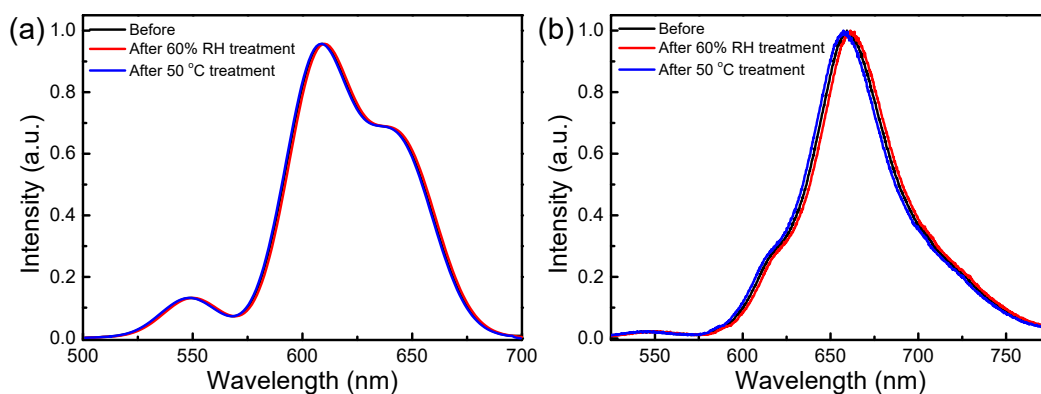

Fig. S5 The PL spectra of (a) thin films and (b) microsheets before and after treatments.

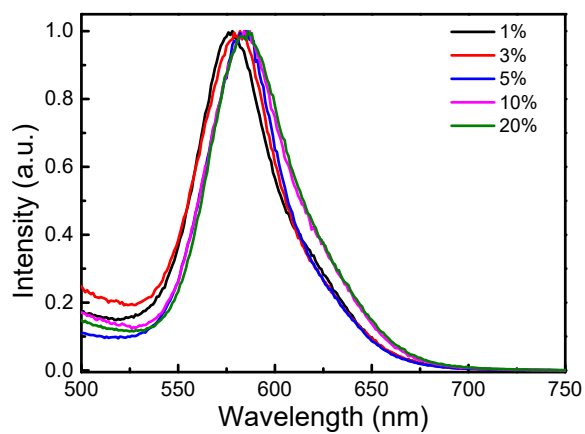

Fig. S6 PL spectra of CBP blend doped with S-BNBP at different doping concentrations.

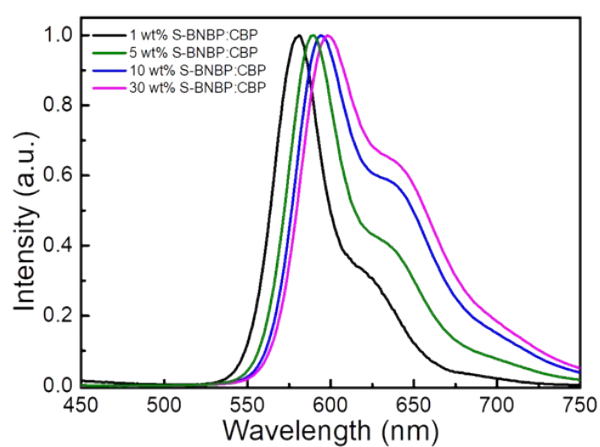

Fig. S7 PL spectra of x wt% S-BNBP:CBP (x=1, 5, 10, 30) doped films.



**Note S1. Estimation of the energy difference between the S<sub>1</sub> and T<sub>1</sub> states ( $\Delta E_{ST}$ ) of the 1 wt% S-BNBP/CBP doping film.**

The values are determined from PLQY and the lifetimes of the fluorescence and TADF components.  $\Phi_F$  and  $\Phi_{DF}$  are calculated by their ratios of the integral areas in the time-resolved spectrum in Fig. S5. Both the prompt and delayed components exhibit biexponential decays, these can be attribute to the coexist of the monomer and dimer in the doping film, so  $\tau_F$  and  $\tau_{DF}$  are the average lifetime of the prompt and delayed components, they are calculated by  $\tau_{av} = \sum A_i \tau_i^2 / \sum A_i \tau_i$ , where  $A_i$  is the pre-exponential for lifetime  $\tau_i$  ( $A_i$  is the proportion of  $\tau_i$  here).

$$\Phi = 0.186$$

$$\Phi_F = 0.181$$

$$\Phi_{DF} = 0.005$$

$$\tau_F = 3.75 \text{ ns}$$

$$\tau_{DF} = 0.155 \text{ } \mu\text{s}$$

$$k_F = 4.83 \times 10^7 \text{ s}^{-1}$$

$$k_{IC} = 2.11 \times 10^8 \text{ s}^{-1}$$

$$k_{ISC} = 7.70 \times 10^6 \text{ s}^{-1}$$

$$\Phi_{IC} = 0.790$$

$$\Phi_{ISC} = 0.029$$

$$k_{DF} = 1.11 \times 10^6 \text{ s}^{-1}$$

$$\Delta E_{ST} = 0.066 \text{ eV}$$

$$k_{RISC} = 1.32 \times 10^6 \text{ s}^{-1}$$

$$k_F = \Phi_F / \tau_F \quad (1)$$

$$\Phi = k_F / (k_F + k_{IC}) \quad (2)$$

$$\Phi_F = k_F / (k_F + k_{IC} + k_{ISC}) \quad (3)$$

$$\Phi_{IC} = k_{IC} / (k_F + k_{IC} + k_{ISC}) \quad (4)$$

$$\Phi_{ISC} = 1 - \Phi_{IC} - \Phi_F = k_{ISC} / (k_F + k_{IC} + k_{ISC}) \quad (5)$$

$$k_{DF} = \Phi_{DF} / \Phi_{ISC} \tau_{DF} \quad (6)$$

$$k_{DF} = 1/3(k_F \exp(-\Delta E_{ST}/RT)) \quad (7)$$

$$k_{RISC} = k_F k_{DF} / (k_F - k_{ISC}) \quad (8)$$

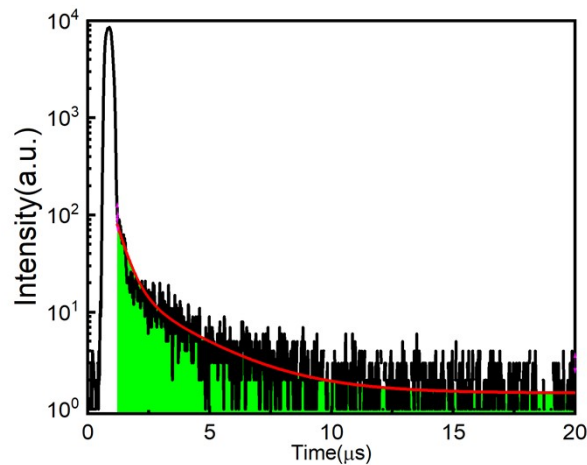

Fig. S8 Transient decay spectra of 1 wt% S-BNBP/CBP thin film at 298 K.

#### 4. Cyclic voltammetry measurement

Cyclic voltammetry (CV) was performed with a CHI660C electrochemistry station using  $\text{Bu}_4\text{NPF}_6$  (0.1 M) as electrolyte, and using Pt as working electrode, platinum wire as auxiliary electrode, and a porous glass wick Ag/AgCl as reference electrode. The HOMO energy level ( $E_{\text{HOMO}}$ ) and the LUMO energy level ( $E_{\text{LUMO}}$ ) can be calculated by the following formula:

$$E_{\text{HOMO}} = -(4.80 + E_{\text{onset}}^{\text{ox}}),$$

$$E_{\text{LUMO}} = -(4.80 + E_{\text{onset}}^{\text{red}}).$$

Table S2. Performance of boron-based red TADF OLEDs

| Device                              | $V_{\text{on}}$<br>(V) | $L_{\text{max}}$ (cd/m <sup>2</sup> ) | $\text{EQE}_{\text{max}}$<br>(%) | $\lambda_{\text{max}}$<br>(nm) | CIE<br>(x, y) | FWHM<br>(nm) | Reference |
|-------------------------------------|------------------------|---------------------------------------|----------------------------------|--------------------------------|---------------|--------------|-----------|
| Px-CNP                              | 5.5                    | 101860                                | 3                                | 606                            | (0.53, 0.44)  | >100         | 1         |
| DMAC2oDBA                           | 3.4                    | 10000                                 | 10.1                             | 615                            | (0.59, 0.40)  | 72           | 2         |
| Ir(btp) <sub>2</sub> acac           | 3.9                    | 1044                                  | 3.82                             | 618                            | (0.67, 0.32)  | >100         | 3         |
| Ir(btp) <sub>2</sub> acac:<br>tBuPZ | 3.2                    | 847.2                                 | 4.11                             | 618                            | (0.63, 0.33)  | >100         | 3         |
| Ir(btp) <sub>2</sub> acac:PZ        | 3.0                    | 932.3                                 | 3.92                             | 618                            | (0.63, 0.34)  | >100         | 3         |
| dPhADBA                             | 3.5                    | -                                     | 11.1                             | 613                            | (0.60, 0.39)  | 102          | 4         |
| dmAcDBA                             | 3.2                    | -                                     | 24.9                             | 583                            | (0.51, 0.48)  | 98           | 4         |
| SpAcDBA                             | 3.0                    | -                                     | 30.0                             | 567                            | (0.46, 0.52)  | 96           | 4         |
| NF-R                                | 4.7                    | 586                                   | 0.28                             | 632                            | (0.64, 0.36)  | -            | 5         |
| NF-S                                | 4.6                    | 554                                   | 0.25                             | 632                            | (0.64, 0.36)  | -            | 5         |
| D-R                                 | 4.0                    | 1055                                  | 2.0                              | 598                            | (0.57, 0.43)  | -            | 5         |
| D-S                                 | 4.0                    | 1008                                  | 2.0                              | 600                            | (0.57, 0.42)  | -            | 5         |
| 5 wt% S-<br>BNBP:CBP                | 3.2                    | 9528                                  | 2.81                             | 590                            | (0.58, 0.41)  | 42           | This work |

#### References

- (1) I. S. Park, S. Y. Lee, C. Adachi, T. Yasuda, *Adv. Funct. Mater.*, 2016, 26, 1813.
- (2) A. Kumar, H. Y. Shin, T. Lee, J. Jung, B. J. Jung, M. H. Lee, *Chem. Eur. J.*, 2020, 26, 16793.
- (3) H. U. Kim, T. Kim, C. Kim, T. Park and S. Sohn, *Dyes Pigments*, 2023, 211, 111064.
- (4) C. M. Hsieh, T. L. Wu, J. Jayakumar, Y. C. Wang, C. L. Ko, W. Y. Hung, T. C. Lin, H. H. Wu, K. H. Lin, C. H. Lin, S. Hsieh and C. H. Cheng, *ACS Appl. Mater. Interfaces*, 2020, 12, 23199
- (5) P. Xue, X. Wang, W. Wang, J. Zhang, Z. Wang, J. Jin, C. Zheng, P. Li, G. Xie and R. Chen, *ACS Appl. Mater. Interfaces*, 2021, 13, 47826.
